# Supplementary material for: High-entropy effect of a metal phosphide on enhanced overall water splitting performance
Source: Royal Society of Chemistry journal article supplement (doi:10.1039/d1ta04755h), 2021-01-01
Supplement: d1ta04755h1.pdf [file d1ta04755h1.pdf]

# High-Entropy Effect of Metal Phosphide on Enhanced Overall Water Splitting Performance

Dawei Lai,<sup>a</sup> Qiaoling Kang,<sup>b</sup> Feng Gao,<sup>a,\*</sup> Qingyi Lu<sup>b,\*</sup>

<sup>a</sup> Department of Materials Science and Engineering, Jiangsu Key Laboratory of Artificial Functional Materials, Collaborative Innovation Center of Advanced Microstructures, College of Engineering and Applied Sciences, Nanjing University, Nanjing 210023, P. R. China. E-mail: fgao@nju.edu.cn

<sup>b</sup> State Key Laboratory of Coordination Chemistry, Coordination Chemistry Institute, Collaborative Innovation Center of Advanced Microstructures, School of Chemistry and Chemical Engineering, Nanjing University, Nanjing 210023, P. R. China. E-mail: qylu@nju.edu.cn

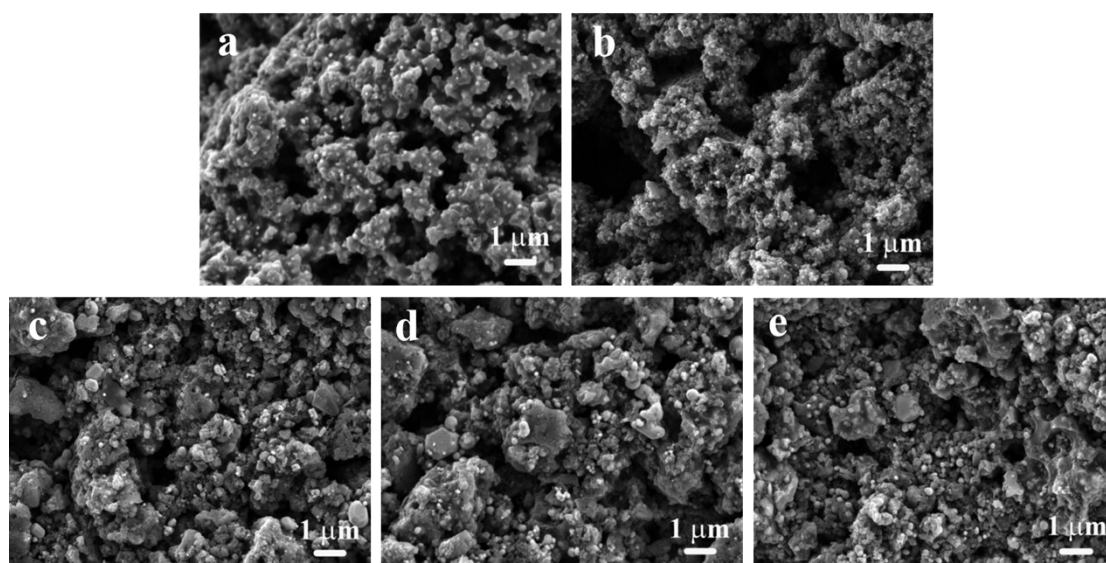

**Figure S1** SEM images of (a) NiP, (b) NiCoP, (c) NiCoFeP, (d) NiCoFeMnP and (e) NiCoFeMnCrP NPs.

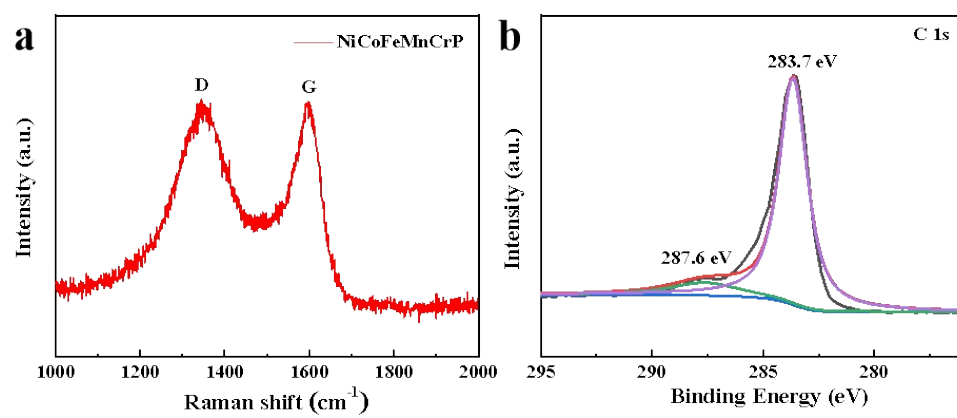

**Figure S2** (a) Raman spectrum and (b) high resolution C1s XPS spectrum of the HEMP sample.

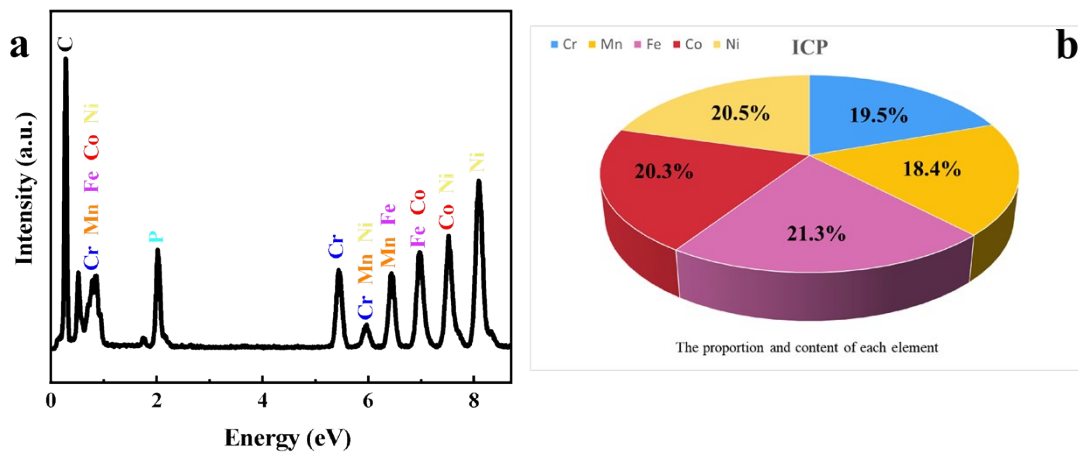

**Figure S3** (a) EDS pattern and (b) ICP of the as-synthesized HMP NiCoFeMnCrP nanoparticles.

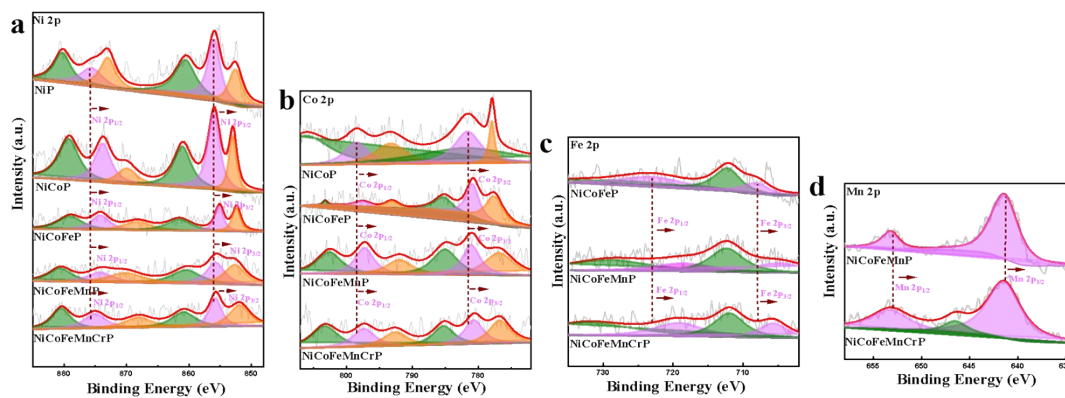

**Figure S4** (a) Ni 2p, (b) Co 2p, (c) Fe 2p and (d) Mn 2p XPS spectra of the different phosphides.

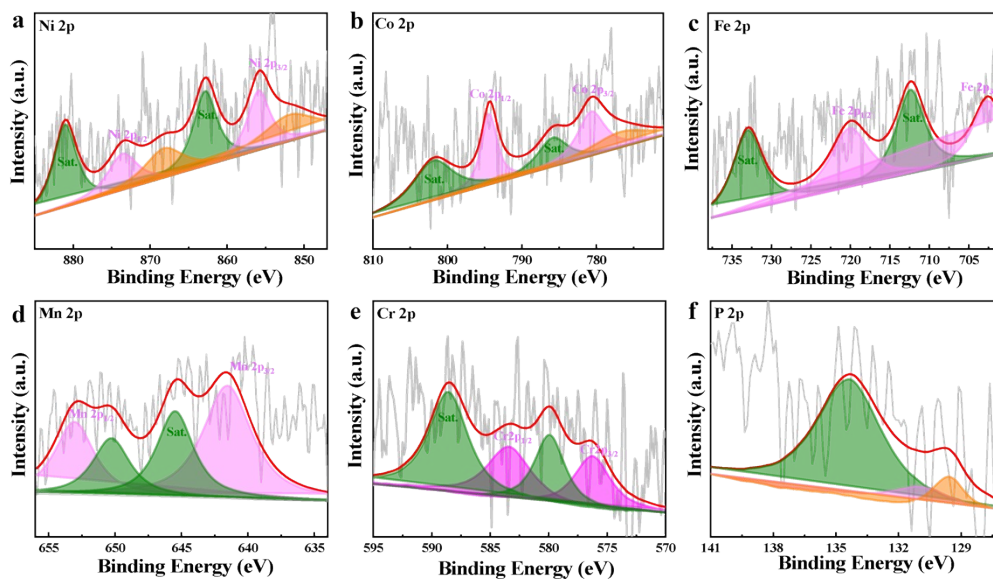

**Figure S5** High-resolution XPS spectra of NiCoFeMnCrP NPs after stability test: (a) Ni 2p, (b) Co 2p, (c) Fe 2p, (d) Mn 2p, (e) Cr 2p and (f) P 2p.

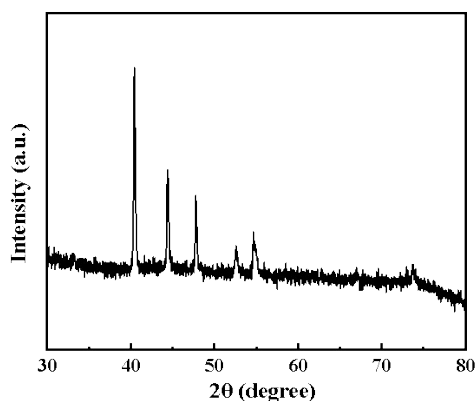

**Figure S6** XRD pattern of NiCoFeMnCrP NPs after stability test.

**Table S1** Comparison between the OER performances of the as-synthesized NiCoFeMnCrP NPs and the reported electrocatalysts.

| Samples                                                | Current density              | Overpotential | Reference                             |
|--------------------------------------------------------|------------------------------|---------------|---------------------------------------|
| <b>NiCoFeMnCrP</b>                                     | <b>10 mA cm<sup>-2</sup></b> | <b>270 mV</b> | <b>This work</b>                      |
| CoFe-MOF                                               | 10 mA cm <sup>-2</sup>       | 265 mV        | ACS Catal. 9 (2019) 7356              |
| Fe-Ni@NC-CNTs                                          | 10 mA cm <sup>-2</sup>       | 274 mV        | Angew. Chem. Int. Ed. 57 (2018) 8921  |
| Ni <sub>3</sub> N-NiMoN                                | 10 mA cm <sup>-2</sup>       | 277 mV        | Nano Energy 44 (2018) 353             |
| Ni-Fe LDH hollow prisms                                | 10 mA cm <sup>-2</sup>       | 280 mV        | Angew. Chem. Int. Ed. 57 (2018) 172   |
| NiPS <sub>3</sub> -G-1:1                               | 10 mA cm <sup>-2</sup>       | 294 mV        | ACS Nano 12 (2018) 5297               |
| CNT-Co <sub>1.33</sub> Fe <sub>0.67</sub> Px           | 10 mA cm <sup>-2</sup>       | 294 mV        | J. Am. Chem. Soc. 142 (2020) 8490     |
| SnCoFeAr                                               | 10 mA cm <sup>-2</sup>       | 300 mV        | Angew. Chem. Int. Ed. 57 (2018) 8691  |
| N-doped Ni@carbon                                      | 10 mA cm <sup>-2</sup>       | 307 mV        | J. Am. Chem. Soc. 142 (2020) 7317     |
| W <sub>2</sub> N/WC                                    | 10 mA cm <sup>-2</sup>       | 320 mV        | Adv. Mater. 32 (2020) 1905679         |
| PHI-Co                                                 | 10 mA cm <sup>-2</sup>       | 324 mV        | Adv. Mater. 32 (2020) 1903942         |
| Co <sub>2</sub> Mo <sub>3</sub> O <sub>8</sub> @NC-800 | 10 mA cm <sup>-2</sup>       | 331 mV        | Angew. Chem. Int. Ed. 59 (2020) 11948 |
| NCoM-SS-Ar                                             | 10 mA cm <sup>-2</sup>       | 340 mV        | Angew. Chem. Int. Ed. 58 (2019) 8330  |
| NCoM-Cb-Ar                                             | 10 mA cm <sup>-2</sup>       | 340 mV        | Angew. Chem. Int. Ed. 58 (2019) 8330  |
| COF-C <sub>4</sub> N                                   | 10 mA cm <sup>-2</sup>       | 349 mV        | ACS Energy Lett. 4 (2019) 2251        |
| CoO/Co                                                 | 10 mA cm <sup>-2</sup>       | 350 mV        | ACS Energy Lett. 2 (2017) 1208        |
| Mo <sub>2</sub> C@N-CNTs                               | 10 mA cm <sup>-2</sup>       | 356 mV        | Angew. Chem. Int. Ed. 58 (2019) 4923  |
| Fe <sub>0.2</sub> Ni <sub>0.8</sub> @N-GR              | 10 mA cm <sup>-2</sup>       | 380 mV        | Adv. Funct. Mater. 28 (2018) 1706928  |

**Table S2** Comparison between the HER performances of the as-synthesized NiCoFeMnCrP NPs and the reported electrocatalysts.

|                         | <b>Current density</b>       | <b>Overpotential</b> | <b>Reference</b>                        |
|-------------------------|------------------------------|----------------------|-----------------------------------------|
| <b>NiCoFeMnCrP</b>      | <b>10 mA cm<sup>-2</sup></b> | <b>220 mV</b>        | <b>This work</b>                        |
| CoP@BCN-1               | 10 mA cm <sup>-2</sup>       | 215 mV               | Adv. Energy Mater. 7 (2017) 601671      |
| Fe <sub>3</sub> C-Co/NC | 10 mA cm <sup>-2</sup>       | 238 mV               | Adv. Funct. Mater. 29 (2019) 901949     |
| Co <sub>2</sub> P       | 10 mA cm <sup>-2</sup>       | 247 mV               | Adv. Mater. 29 (2017) 1606980           |
| NiFeOF                  | 10 mA cm <sup>-2</sup>       | 253 mV               | ACS Catal. 7 (2017) 8406                |
| Co/CoP-5                | 10 mA cm <sup>-2</sup>       | 253 mV               | Adv. Energy Mater. 7 (2017) 602355      |
| FeNi foam               | 10 mA cm <sup>-2</sup>       | 299 mV               | Adv. Mater. 30 (2018) 1803151           |
| LDH-NS@DG               | 10 mA cm <sup>-2</sup>       | 300 mV               | Adv. Mater. 29 (2017) 1700017           |
| NiFeP                   | 10 mA cm <sup>-2</sup>       | 355 mV               | Int. J. Hydrogen Energy 43 (2018) 12929 |
| N,S-CN                  | 10 mA cm <sup>-2</sup>       | 380 mV               | ACS Nano 11 (2017) 7293                 |

**Table S3** Comparison between the overall water splitting performances of the as-synthesized NiCoFeMnCrP NPs and the reported electrocatalysts.

|                                                          | <b>Voltage</b> | <b>Current density</b>       | <b>Reference</b>                      |
|----------------------------------------------------------|----------------|------------------------------|---------------------------------------|
| <b>NiCoFeMnCrP</b>                                       | <b>1.32 V</b>  | <b>10 mA cm<sup>-2</sup></b> | <b>This work</b>                      |
| N-Co <sub>3</sub> O <sub>4</sub> @C@NF                   | 1.40 V         | 10 mA cm <sup>-2</sup>       | Adv. Sci. 6 (2019) 1900272            |
| Fe <sub>0.09</sub> Co <sub>0.13</sub> -NiSe <sub>2</sub> | 1.52 V         | 10 mA cm <sup>-2</sup>       | Adv. Mater. 30 (2018) 1802121         |
| Ni <sub>3</sub> N-NiMoN-5                                | 1.54 V         | 10 mA cm <sup>-2</sup>       | Nano Energy 44 (2018) 353             |
| CoSn <sub>2</sub>                                        | 1.55 V         | 10 mA cm <sup>-2</sup>       | Angew. Chem. Int. Ed. 57 (2018) 15237 |
| Co <sub>2</sub> P NC                                     | 1.56 V         | 10 mA cm <sup>-2</sup>       | Adv. Mater. 30 (2018) 1705796         |
| W <sub>2</sub> N/WC                                      | 1.58 V         | 10 mA cm <sup>-2</sup>       | Adv. Mater. 32 (2020) 1905679         |
| NiCoP                                                    | 1.59 V         | 10 mA cm <sup>-2</sup>       | Adv. Energy Mater. 8 (2018) 1802615   |
| 3DSe(NiCo)S <sub>x</sub> /(OH) <sub>x</sub>              | 1.6 V          | 10 mA cm <sup>-2</sup>       | Adv. Mater. 30 (2018) 1705538         |
| NC@CuCo <sub>2</sub> N <sub>x</sub> /CF                  | 1.62 V         | 10 mA cm <sup>-2</sup>       | Adv. Funct. Mater. 27 (2017) 1704169  |
| δ-FeOOH NSs/NF                                           | 1.62 V         | 10 mA cm <sup>-2</sup>       | Adv. Mater. 30 (2018) 1803144         |
| Ni-Co-P HNBS                                             | 1.62 V         | 10 mA cm <sup>-2</sup>       | Energy Environ. Sci. 11 (2018) 872    |
| Co/b-Mo <sub>2</sub> C@N-CNTs                            | 1.64 V         | 10 mA cm <sup>-2</sup>       | Angew. Chem. Int. Ed. 58 (2019) 4923  |
| Co/CNFs (1000)                                           | 1.69 V         | 10 mA cm <sup>-2</sup>       | Adv. Mater. 31 (2019) 1808043         |
| Co(OH) <sub>2</sub> @NCNTs@ NF                           | 1.72 V         | 10 mA cm <sup>-2</sup>       | Nano Energy 47 (2018) 96              |
| Fe <sub>3</sub> C-Co/NC                                  | 1.77 V         | 10 mA cm <sup>-2</sup>       | Adv. Funct. Mater. 29 (2019) 1901949  |
